# Supplementary material for: Anthocyanin, a novel and user-friendly reporter for convenient, non-destructive, low cost, directly visual selection of transgenic hairy roots in the study of rhizobia-legume symbiosis
Source: Plant Methods. 2020 Jul 6;16:94. doi: 10.1186/s13007-020-00638-w (PMC7339386; doi:10.1186/s13007-020-00638-w)
Supplement: Supplementary file 1 — Additional file 1: Table S1. Anthocyanin accumulation on transgenic hairy roots containing 35S:: AtMyb75 in various soybean cultivars. Data were obtained by three independent experiment with at least infected 8 seedlings. [file 13007_2020_638_MOESM1_ESM.xlsx]

## Sheet: Sheet1
Germplasm no.	Variety	Purple hypocotyl	Purple roots with anthocyanin accumlation
WDD00475	Wilson Five	Purple	Yes
WDD00289	T221	Purple	Yes
	Xiangfeng4	Purple	Yes
WDD00476	Wilson Five B	Purple	Yes
PI377578		Purple	Yes
WDD00472	Sooty	Purple	Yes
WDD02302		Purple	Yes
WDD03003		Purple	Yes
WDD00853		Purple	Yes
WDD00649		Purple	Yes
WDD01645		Purple	Yes
WDD00713		Purple	Yes
WDD01622		Purple	Yes
WDD02355		Purple	Yes
WDD01480		Purple	Yes
WDD02917		Purple	Yes
WDD01202		Purple	Yes
PC31577		Purple	Yes
WDD00803		Purple	Yes
WDD01715		Purple	Yes
WDD00666		Purple	Yes
WDD00481		Purple	Yes
WDD016206		Purple	Yes
WDD02114		Purple	Yes
WDD00803		Purple	Yes
WDD00410		Purple	Yes
WDD02019		Purple	Yes
WDD00853		Purple	Yes
WDD01947		Purple	Yes
WDD61559		Purple	Yes
WDD02102		Purple	Yes
WDD03019		Purple	Yes
WDD00033		Purple	Yes
WDD00176		Purple	Yes
WDD02880		Purple	Yes
WDD03092		Purple	Yes
WDD01659		Purple	Yes
WDD00628		Purple	Yes
WDD02183		Purple	Yes
WDD01662		Green	No
WDD02336		Green	No
WDD00899		Green	No
WDD02340		Green	No
WDD01650		Green	No
WDD02340		Green	No
WDD02169		Green	No
WDD03160		Green	No
WDD00412		Green	No
WDD01659		Green	No
WDD00042		Green	No
WDD01623		Green	No
WDD02238		Green	No
WDD02155		Green	No
WDD02702		Green	No
	Hill	Green	No
PI548402	Peking	Green	No
	Shanning2	Green	No
WDD02040		Green	No
WDD03016		Green	No
WDD00341		Green	No
WDD03016		Green	No
WDD00721		Green	No
WDD03001		Green	No
WDD00585		Green	No
WDD03116		Green	No
WDD02323		Green	No
WDD03001		Green	No
WDD01619		Green	No
WDD00467		Green	No
WDD01599		Green	No
ZDD11226	guanyunhai	Green	No
WDD03039		Green	No
WDD01655		Green	No
WDD00405		Green	No
WDD01626		Green	No
WDD01614		Green	No
WDD02329		Green	No
WDD03160		Green	No
WDD01612		Green	No
WDD01665		Green	No
WDD02002		Green	No
WDD01662		Green	No
ZDD24801		Green	No
WDD02913		Green	No
WDD02075		Green	No
PI518571	Williams82	Green	No
